# Supplementary material for: Functional Recombinants Designed from a Fetuin/Asialofetuin-Specific Marine Algal Lectin, Rhodobindin
Source: MDPI journal article supplement (doi:10.3390/md13042183), 2015-04-13
Supplement: s1 [file s1]

# Supplementary Information

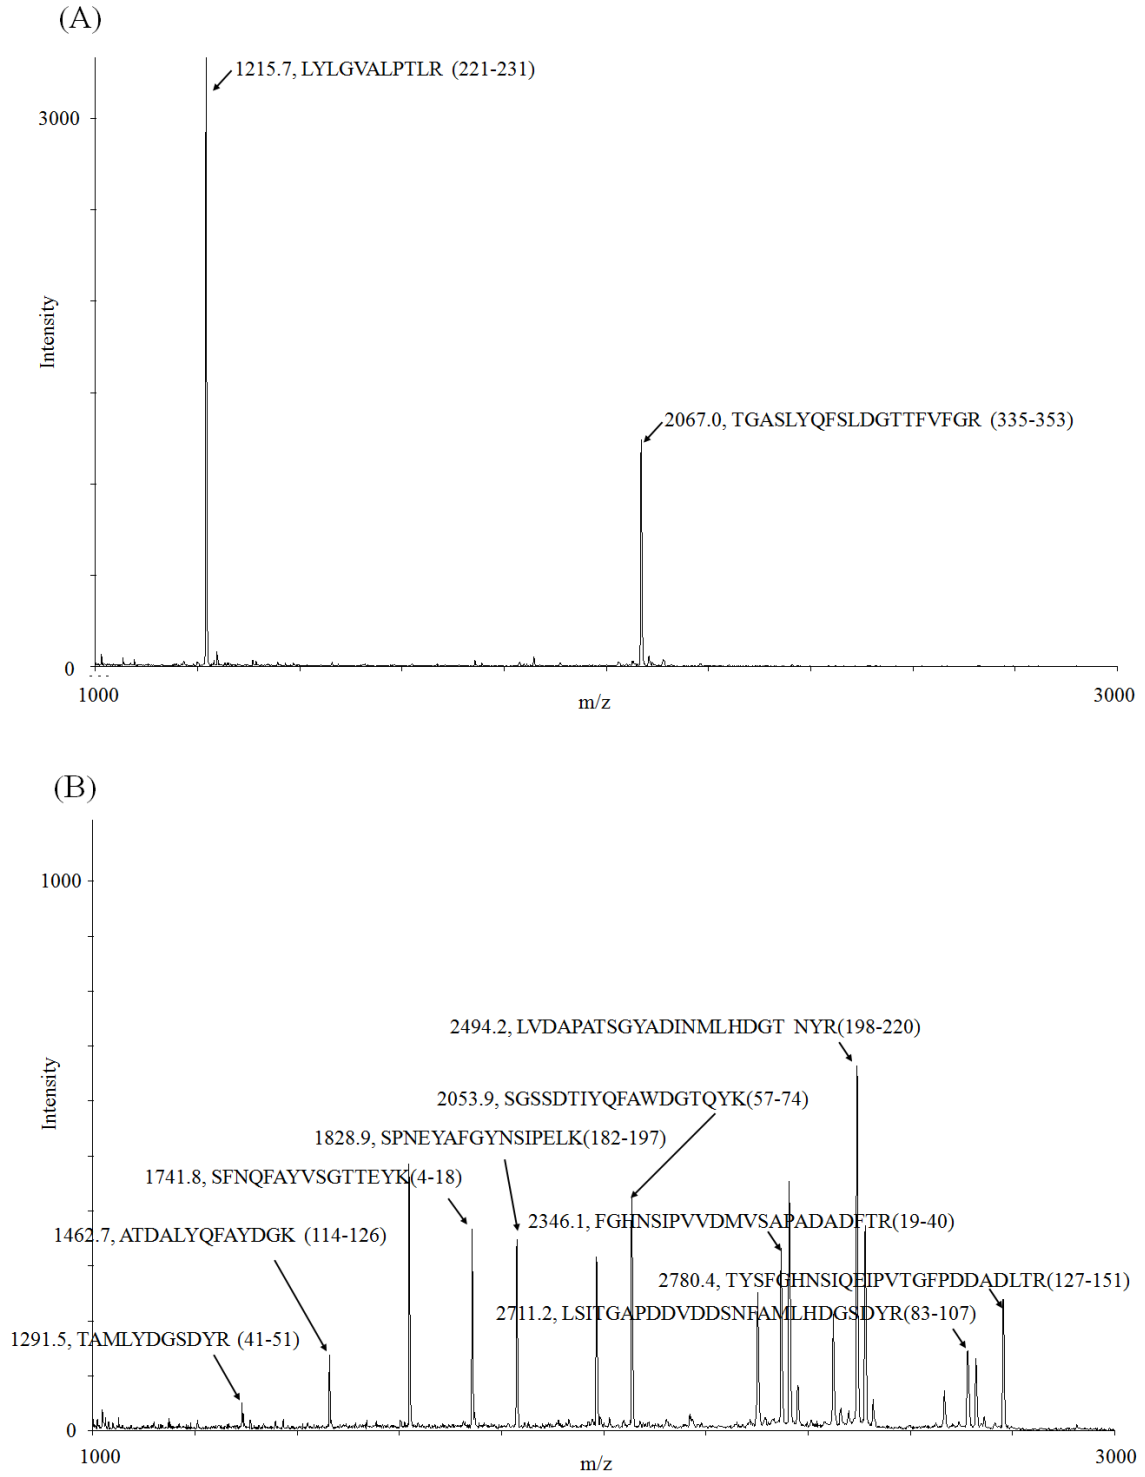

Figure S1. Cont.

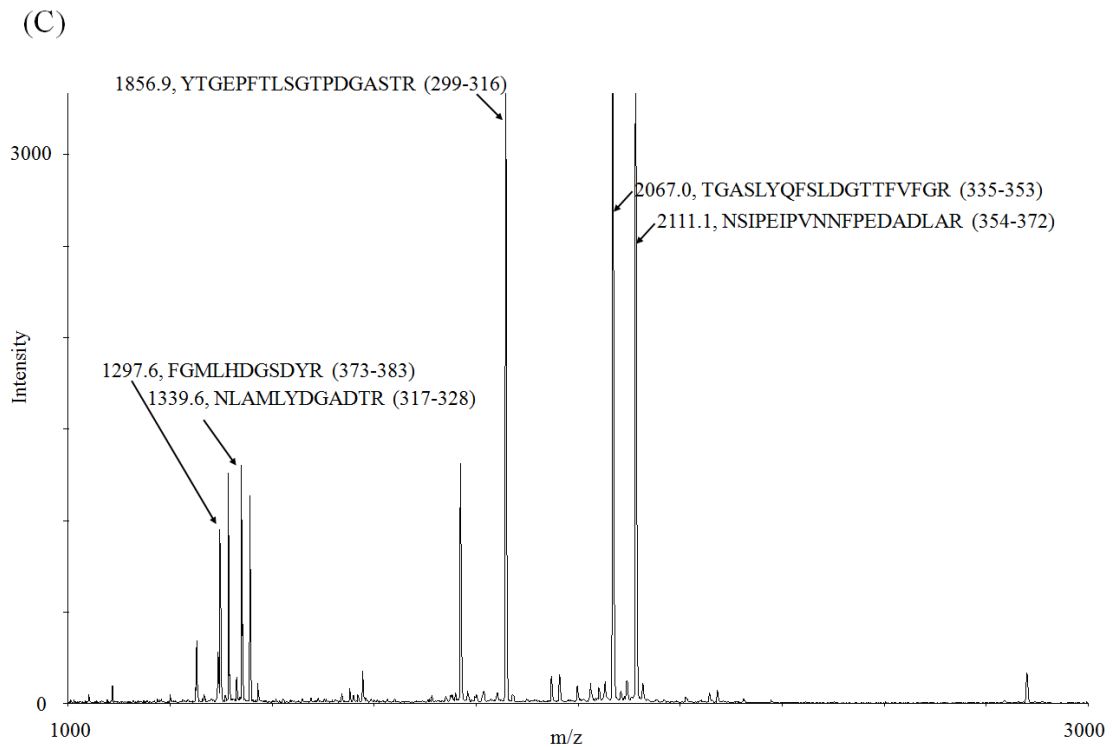

**Figure S1.** MALDI-TOF spectrometry. Arrows indicate matched peptide with predicted sequences (A) Whole protein; (B) rD1; (C) rD2.

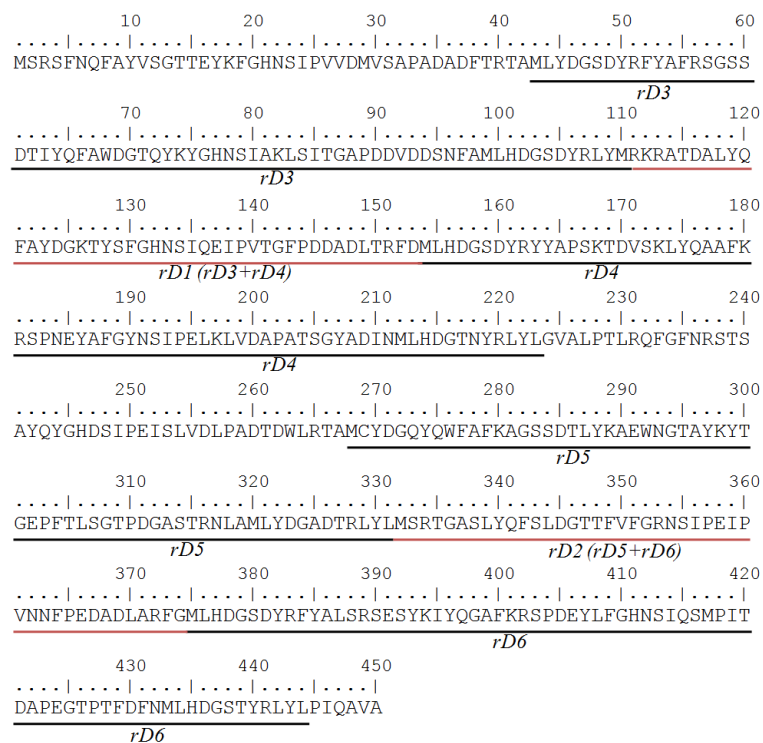

**Figure S2.** Amino acid sequence of Rhodobindin. Each domain was underlined (rD1–rD6).
